# Supplementary material for: Design and Discovery of Quinazoline- and Thiourea-Containing Sorafenib Analogs as EGFR and VEGFR-2 Dual TK Inhibitors
Source: PubMed Central journal article supplement (PMC5943947; doi:10.3390/molecules23010024), 2017-12-23

### Compound 10i

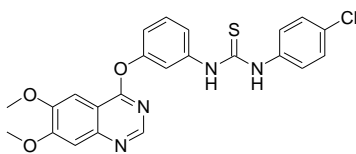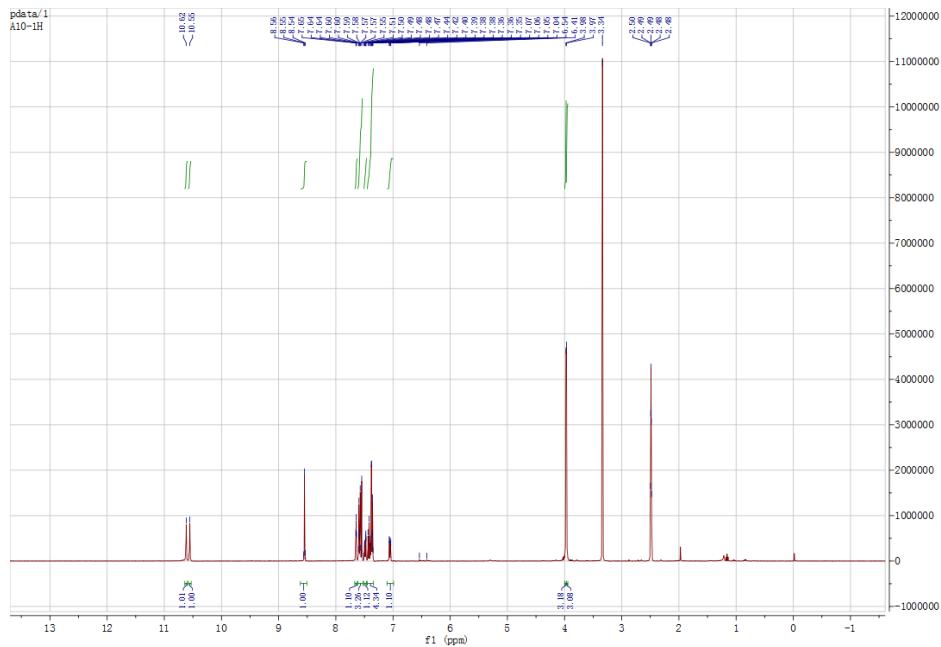

### Compound 10j

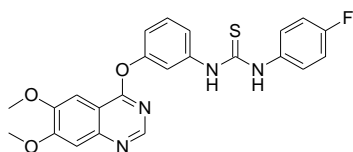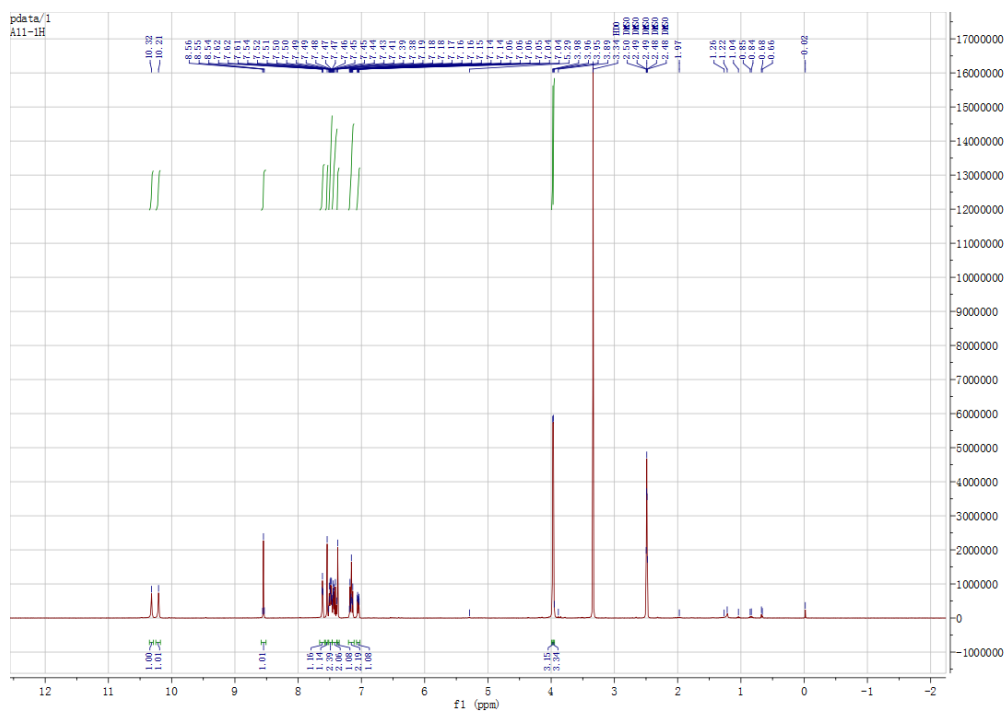

# Compound 10k

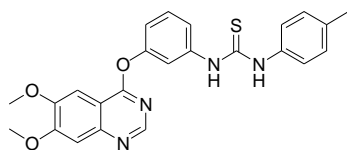

KXK-2-109-1-1H

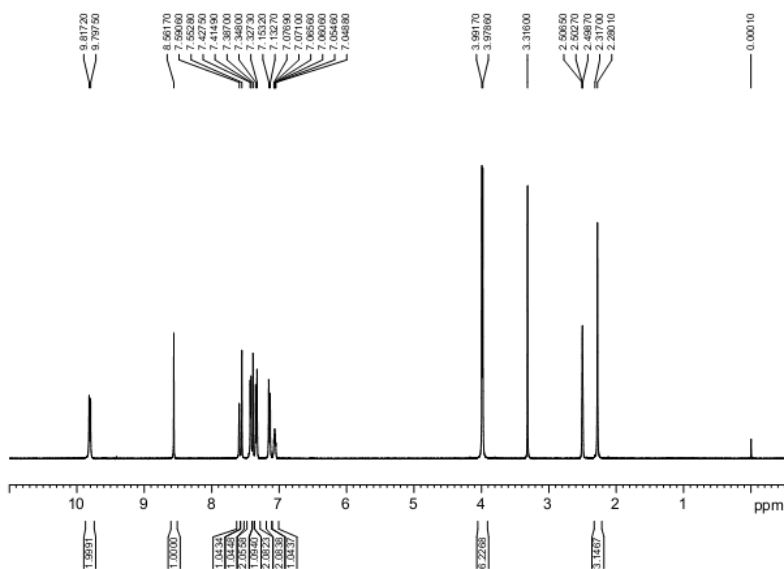

Current Data Parameters  
 NAME Proton-9  
 EXPNO 6197  
 PROCNO 1

F2 - Acquisition Parameters  
 Date\_ 20141217  
 Time 10:37  
 INSTRUM a400  
 PROBHD 5 mm DUL 13C-1  
 PULPROG zg30  
 TD 65536  
 FIDRES 0.182959 Hz  
 AQ 2.7329011 sec  
 SFO1 400.1315084 MHz  
 SOLVENT DMSO  
 NS 16  
 DS 0  
 SWH 11990.407 Hz  
 RG 64  
 DE 6.00 usec  
 TE 298.2 K  
 D1 100000000 sec  
 MCREST 0.0000000 sec  
 MCWRR 0.01500000 sec

==== CHANNEL f1 =====  
 NU1 1H  
 P1 7.20 usec  
 PL1 -2.00 dB  
 SFO1 400.1315084 MHz

F2 - Processing parameters  
 SI 32768  
 SF 400.1300026 MHz  
 WDW EM  
 SSB 0  
 LB 0.30 Hz  
 GB 0  
 PC 1.00

# Compound 10l

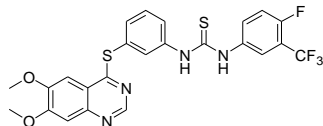

XFM-0513-1-1H

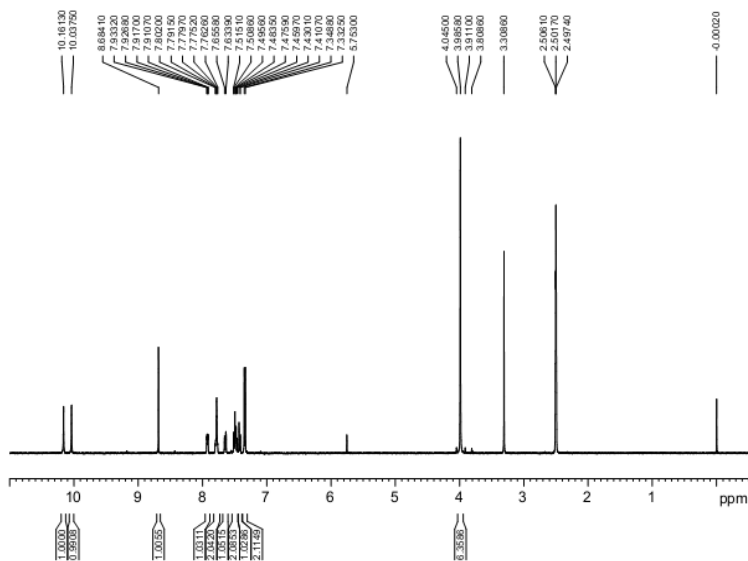

Current Data Parameters  
 NAME Proton-9  
 EXPNO 6160  
 PROCNO 1

F2 - Acquisition Parameters  
 Date\_ 20141217  
 Time 10:55  
 INSTRUM a400  
 PROBHD 5 mm DUL 13C-1  
 PULPROG zg30  
 TD 65536  
 FIDRES 0.182959 Hz  
 AQ 2.7329011 sec  
 SFO1 400.1315084 MHz  
 SOLVENT DMSO  
 NS 16  
 DS 0  
 SWH 11990.407 Hz  
 RG 64  
 DE 6.00 usec  
 TE 298.2 K  
 D1 100000000 sec  
 MCREST 0.0000000 sec  
 MCWRR 0.01500000 sec

==== CHANNEL f1 =====  
 NU1 1H  
 P1 7.20 usec  
 PL1 -2.00 dB  
 SFO1 400.1315084 MHz

F2 - Processing parameters  
 SI 32768  
 SF 400.1300030 MHz  
 WDW EM  
 SSB 0  
 LB 0.30 Hz  
 GB 0  
 PC 1.00

### Compound 10m

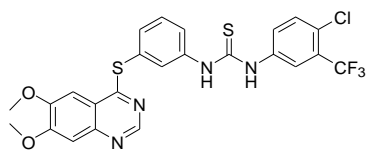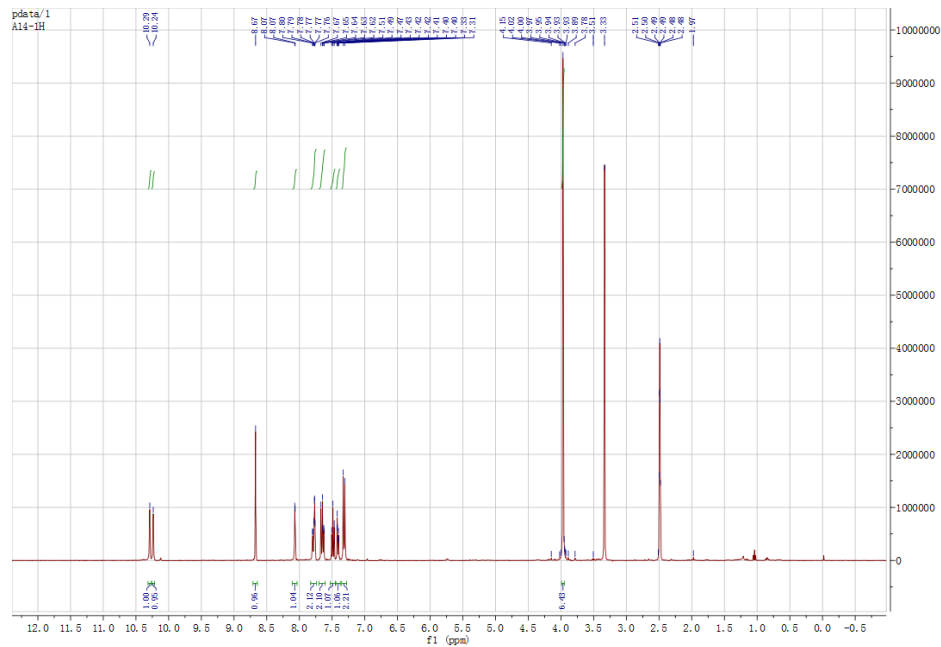

### Compound 10n

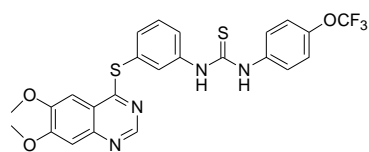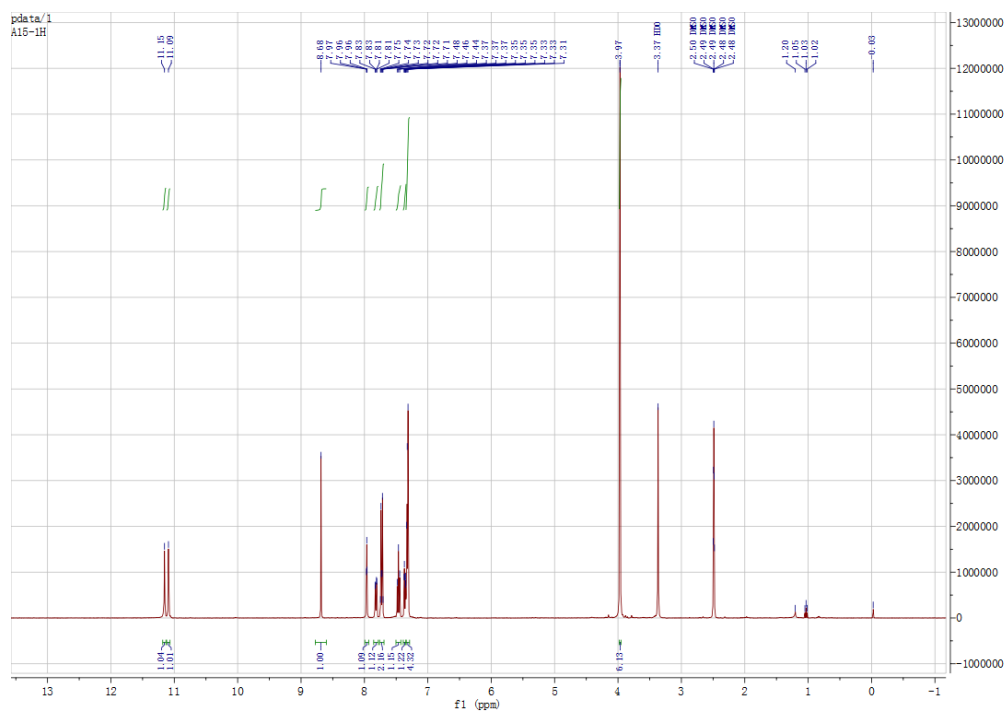

# Compound 10o

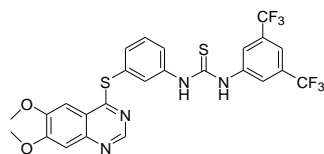

KXK-2-77-2-1H

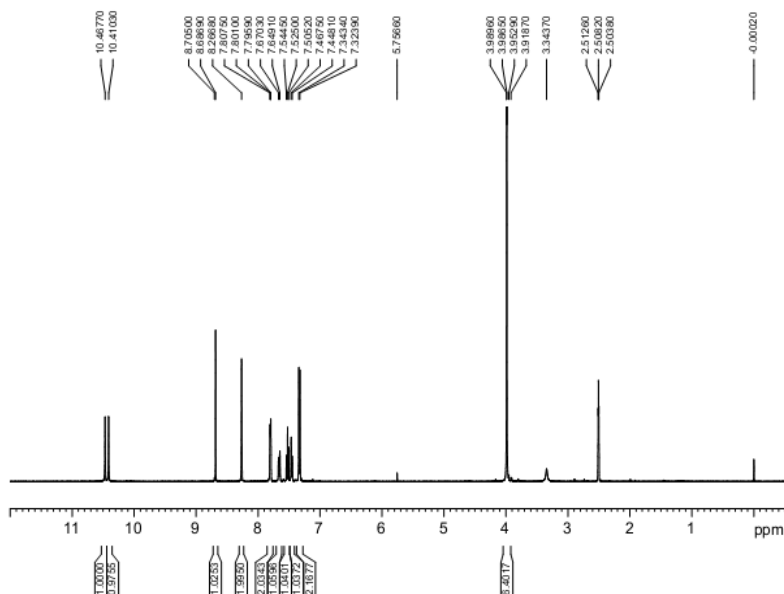

```

Current Data Parameters
NAME: Proton-6
EXPNO: 6154
PROCNO: 1

F2 - Acquisition Parameters
Date_: 20141217
Time: 10.17
INSTRUM: s400
PROBHD: 5 mm DUL 13C-1
PULPROG: zg30
TD: 65536
SOLVENT: DMSO
NS: 16
DS: 0
SWH: 11990.407 Hz
FIDRES: 0.182959 Hz
AQ: 2.7329011 sec
RG: 64
DW: 41.700 usec
DE: 6.00 usec
TE: 298.2 K
D1: 1.00000000 sec
MCREST: 0.00000000 sec
MCWRK: 0.01500000 sec

===== CHANNEL f1 =====
NUC1: 1H
P1: 7.20 usec
PL1: -2.00 dB
SFO1: 400.1315084 MHz

F2 - Processing parameters
SI: 32768
SF: 400.1300004 MHz
WDW: EM
SSB: 0
LB: 0.30 Hz
GB: 0
PC: 1.00
    
```

# Compound 10p

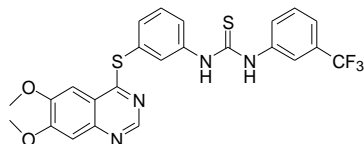

KXK-2-77-4-1H

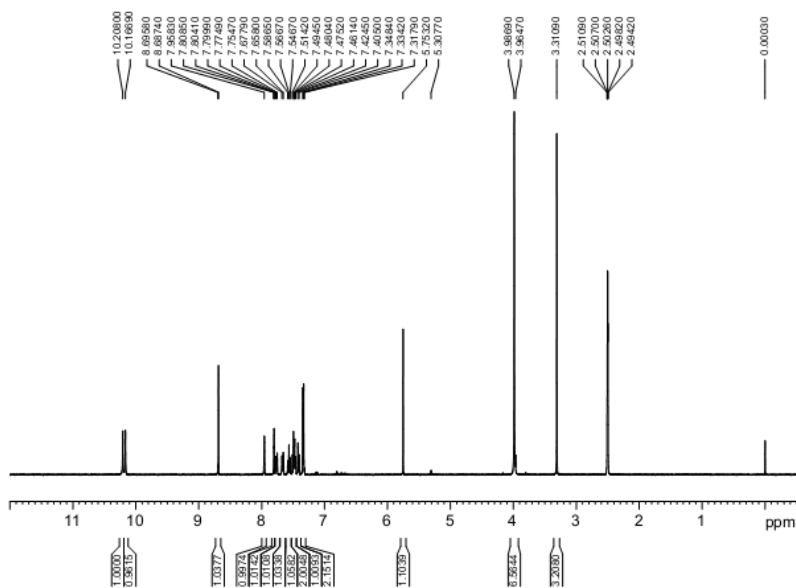

```

Current Data Parameters
NAME: Proton-6
EXPNO: 6155
PROCNO: 1

F2 - Acquisition Parameters
Date_: 20141217
Time: 10.24
INSTRUM: s400
PROBHD: 5 mm DUL 13C-1
PULPROG: zg30
TD: 65536
SOLVENT: DMSO
NS: 16
DS: 0
SWH: 11990.407 Hz
FIDRES: 0.182959 Hz
AQ: 2.7329011 sec
RG: 64
DW: 41.700 usec
DE: 6.00 usec
TE: 298.2 K
D1: 1.00000000 sec
MCREST: 0.00000000 sec
MCWRK: 0.01500000 sec

===== CHANNEL f1 =====
NUC1: 1H
P1: 7.20 usec
PL1: -2.00 dB
SFO1: 400.1315084 MHz

F2 - Processing parameters
SI: 32768
SF: 400.1300026 MHz
WDW: EM
SSB: 0
LB: 0.30 Hz
GB: 0
PC: 1.00
    
```







### Compound 10u

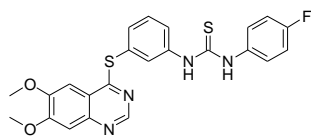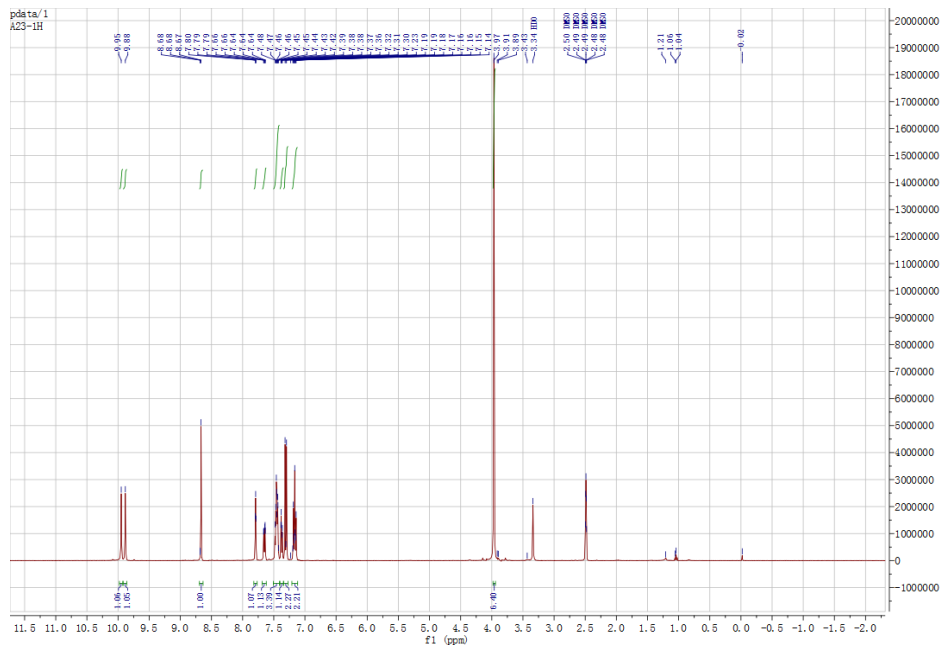

### Compound 10v

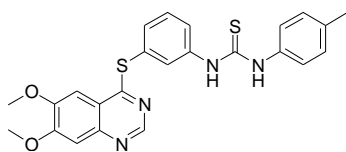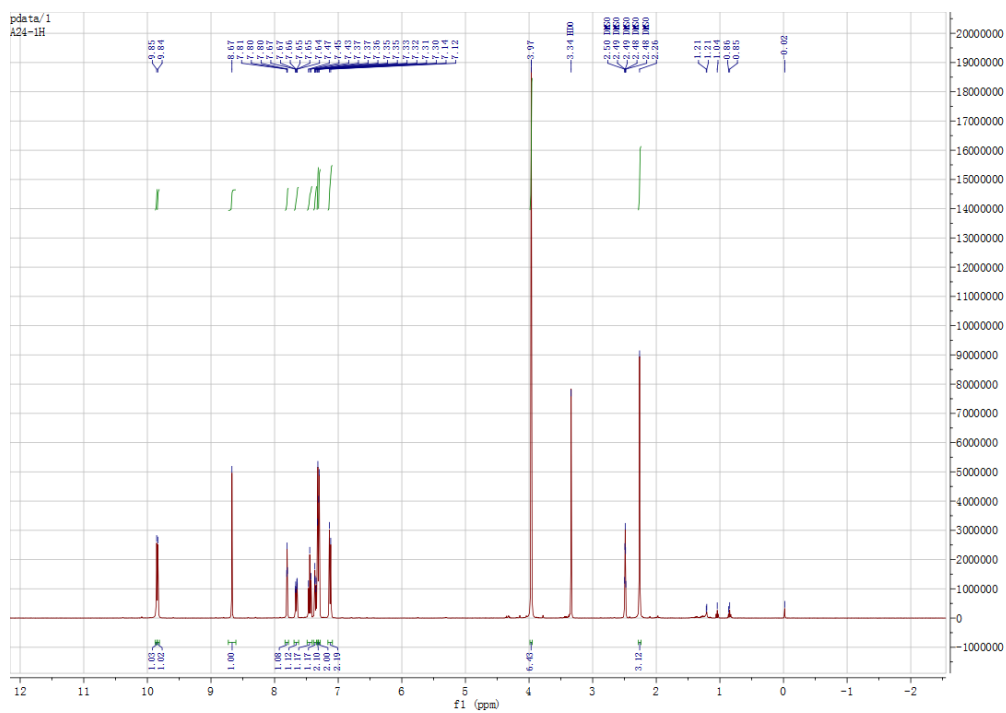

Supplement: molecules-23-00024-s001.pdf [file molecules-23-00024-s001.pdf]
